# Supplementary material for: Enhanced activation of persulfate improves the selective oxidation of alcohols catalyzed by earth-abundant metal oxides embedded on porous N-doped carbon derived from chitosan
Source: Royal Society of Chemistry journal article supplement (doi:10.1039/d2re00566b), 2023-01-01
Supplement: d2re00566b1.pdf [file d2re00566b1.pdf]

## Supporting Information

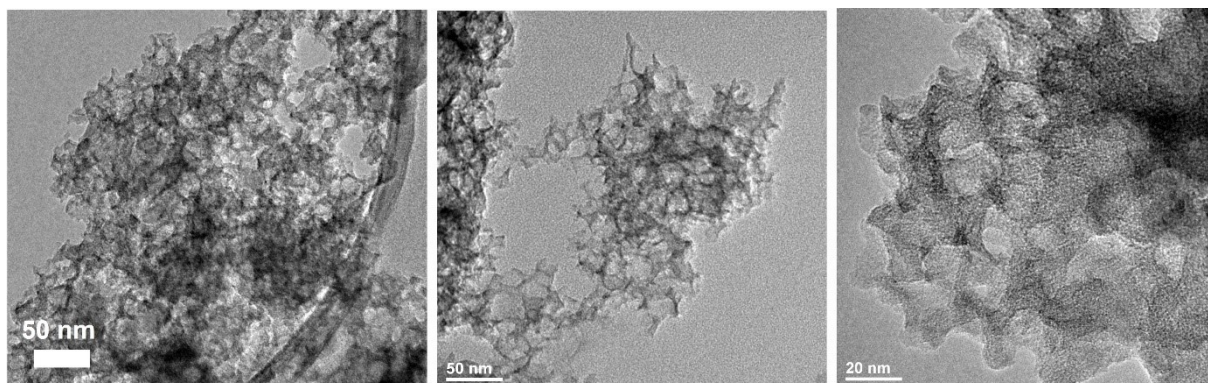

Figure S 1 TEM images of CN-meso

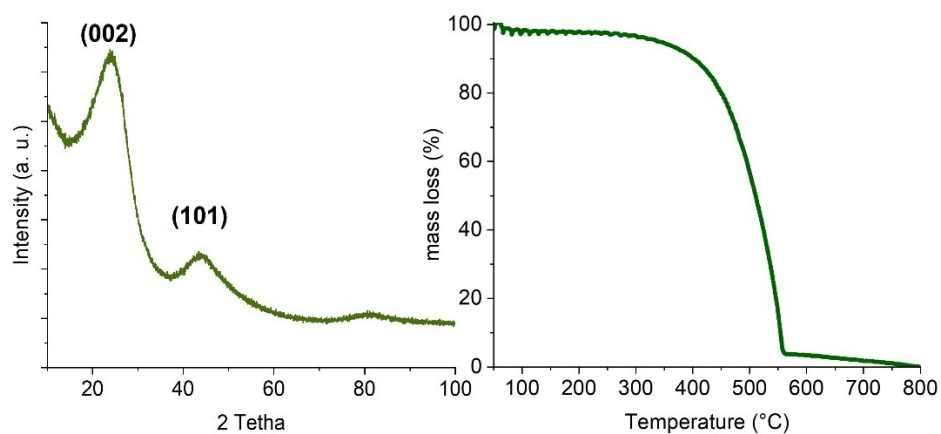

Figure S 2 XRD analysis (left frame) and TG analysis (right frame) of CN-meso

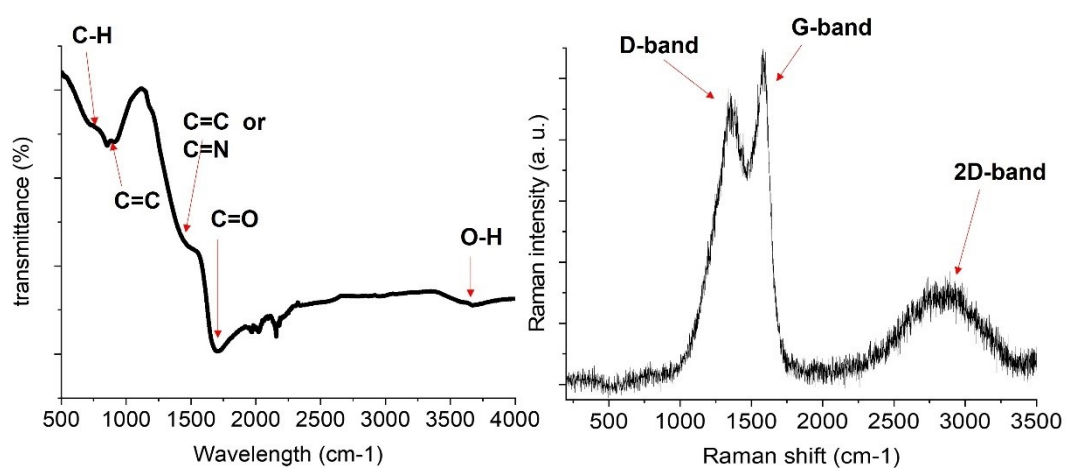

Figure S 3 FTIR of CN-meso (left) and Raman Spectra of CN-meso (right)

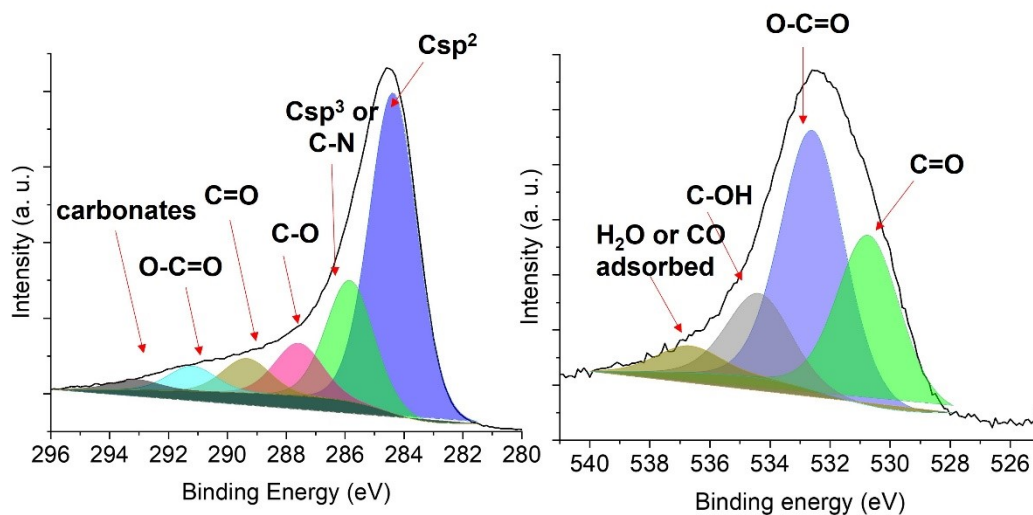

Figure S 4 High-resolution C1s XPS spectra (left) and high-resolution O1s XPS spectra of CN-meso.

Table S 1 Surface area and pore volume values of synthesized materials

| Material   | Surface area (m <sup>2</sup> /g) | Pore volume (cm <sup>3</sup> /g) |
|------------|----------------------------------|----------------------------------|
| CN-meso    | 834                              | 3.3                              |
| CN-meso/Ni | 789                              | 3.1                              |
| CN-meso/Co | 801                              | 2.9                              |
| CN-meso/Cu | 762                              | 3.2                              |
| Cn-meso/Fe | 720                              | 3.0                              |

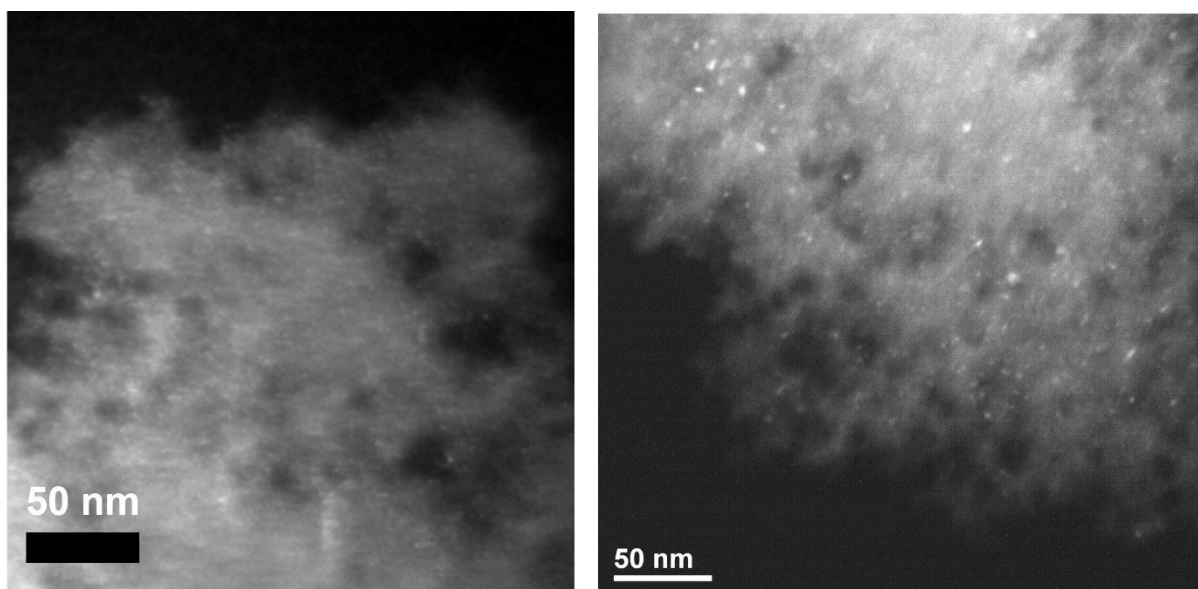

Figure S 5 Dark-field TEM images of CN-meso/Ni (left) and CN-meso/Fe (right)

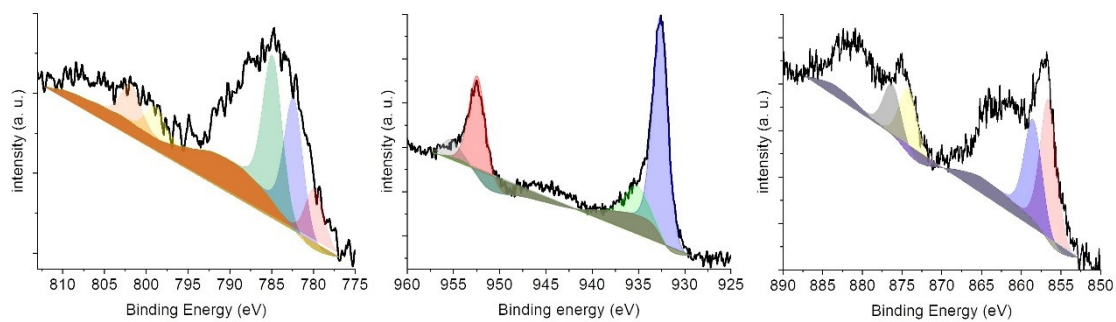

Figure S 6 High-resolution XPS of spent catalysts (a) CN-meso/Co; (b) CN-meso/Cu; (c) CN-meso/Ni

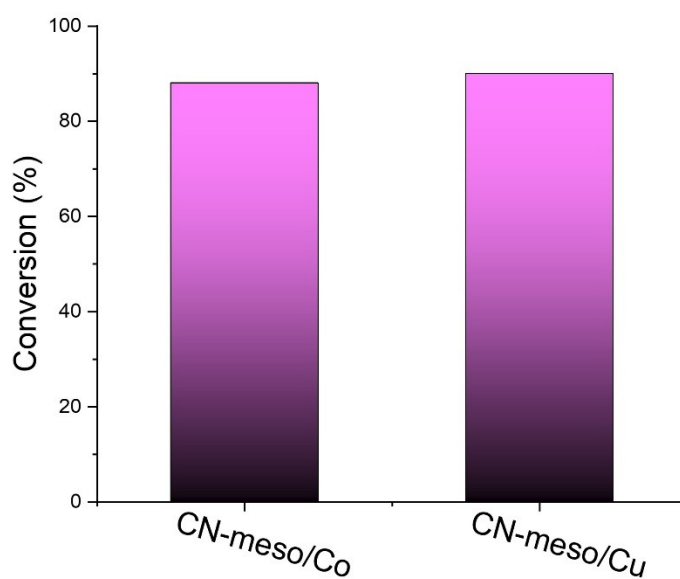

Figure S 7 Conversion of benzyl alcohol with the addition of sodium azide (25 eq.) as a scavenger

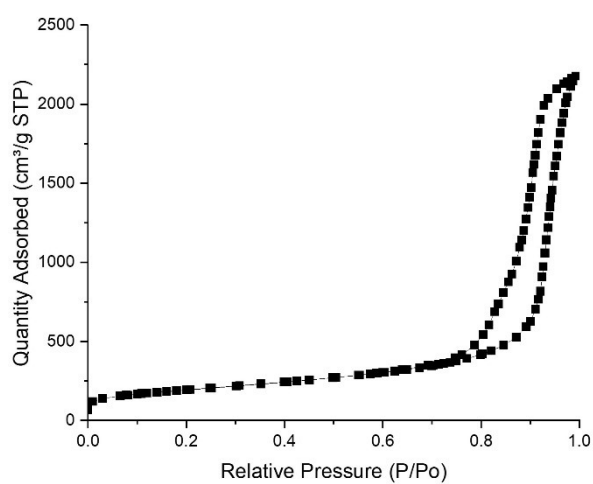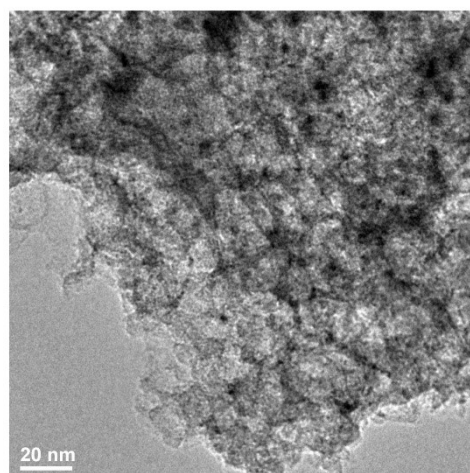

Figure S 8  $N_2$  physisorption isotherm of CN-meso/Cu (left) and TEM image of CN-meso/Cu after 5 cycles
